# Supplementary material for: Development of a Natural Language Processing Algorithm for the Classification of Suspicious Liver Lesions from Radiology Reports
Source: medRxiv preprint, doi:10.1101/2021.12.15.21267875, version 1 (2021-12-16)
Supplement: Supplemental methods [file 267875_file02.docx]

Supplemental:

NLP criteria for a suspicious liver lesion:

- Positive if the report mentions:
  - Imaging is recommended unequivocally to further evaluate a liver lesion
  - Report mentions a cystic mass.
  - Liver lesion that is indeterminate with or without follow up recommendation.
  - Suspected hemangioma but recommend follow up
  - Something in findings related to a suspicious liver lesion but never recommends anything for it. Report does not call it indeterminate.
  - Known suspicious liver lesions that may or may not be described in more detail.
- Negative if the report mentions:
  - Cyst, too small to characterize.
  - Lesion favored to be a cyst.
  - Stable hypodensity with no other description.
  - Small hypodensity not otherwise characterized.
  - Liver granulomas.
  - Lipoma.
